# Supplementary material for: Surface chemistry altering electronic behaviour of liquid metal-derived tin oxide nanosheets
Source: Royal Society of Chemistry journal article supplement (doi:10.1039/d4nr01841a), 2024-01-01
Supplement: d4nr01841a1.pdf [file d4nr01841a1.pdf]

## Supplementary Information

# Surface Chemistry Altering Electronic Behaviours of Liquid Metal-Derived Tin Oxide Nanosheets

*Xiaotian Wei<sup>1</sup>, Chung Kim Nguyen<sup>1</sup>, Patrick D. Taylor<sup>2</sup>, Vaishnavi Krishnamurthi<sup>1</sup>, Nitu Syed<sup>1,4</sup>,  
Phuong Y. Le<sup>2</sup>, Michelle J.S. Spencer<sup>3</sup>, Torben Daeneke<sup>1\*</sup> and Lei Bao<sup>1\*</sup>*

<sup>1</sup> School of Engineering, RMIT University, Australia

<sup>2</sup> School of Science, RMIT University, Australia

<sup>3</sup> ARC Centre of Excellence in Future Low-Energy Electronics Technologies,  
School of Science, RMIT University, Australia

<sup>4</sup> ARC Centre of Excellence for Transformative Meta-Optical Systems,  
The University of Melbourne, Australia

\*E-mail: [torben.daeneke@rmit.edu.au](mailto:torben.daeneke@rmit.edu.au); [lei.bao@rmit.edu.au](mailto:lei.bao@rmit.edu.au)

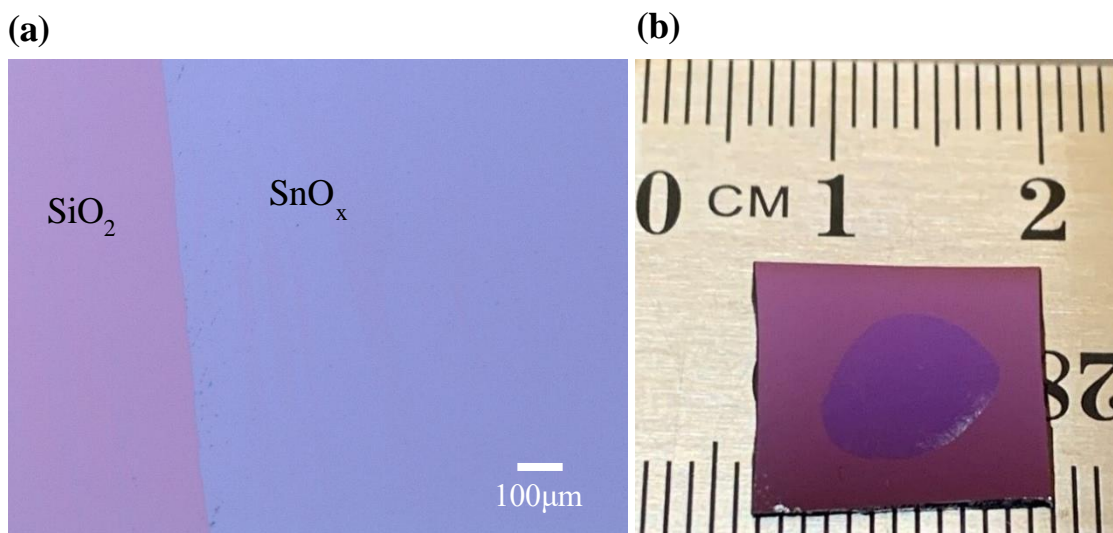

**Figure S1.** LM technique produced a SnO<sub>x</sub> nanosheet. (a) An optical microscopy image of obtained pristine SnO<sub>x</sub> nanosheet depositing onto 300 nm SiO<sub>2</sub> coated Si substrate. (b) A photo obtained pristine SnO<sub>x</sub> nanosheet in 1x1 cm<sup>2</sup> touch printed onto a 300 nm SiO<sub>2</sub> coated Si substrate.

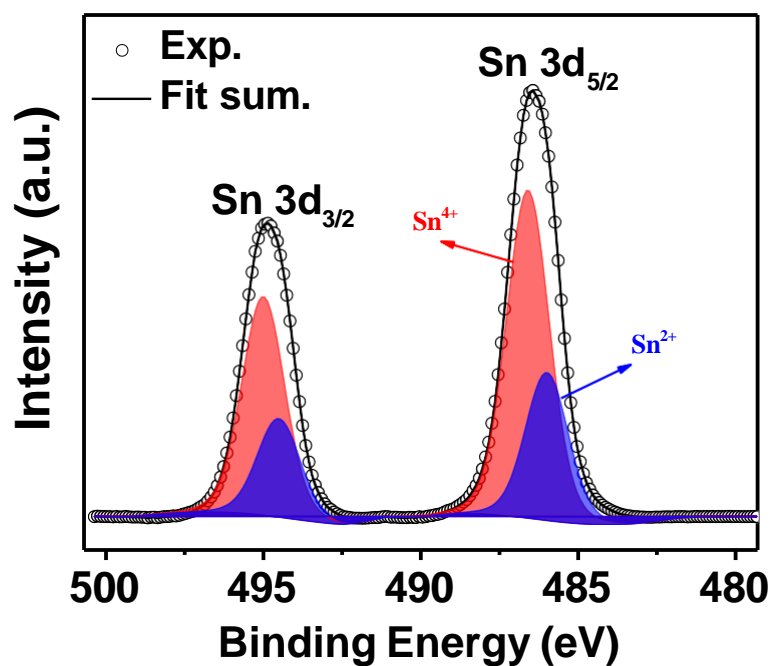

**Figure S2.** XPS spectra in the Sn 3d region of as-synthesized pristine SnO<sub>x</sub> nanosheet.

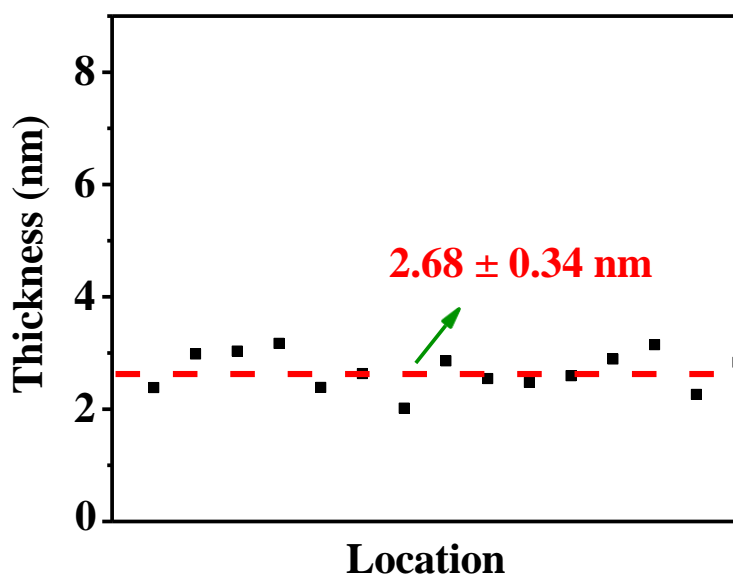

**Figure S3.** The thickness of the SnO<sub>2</sub> nanosheet dependency on the measured location, indicating the thickness consistency across the sample.

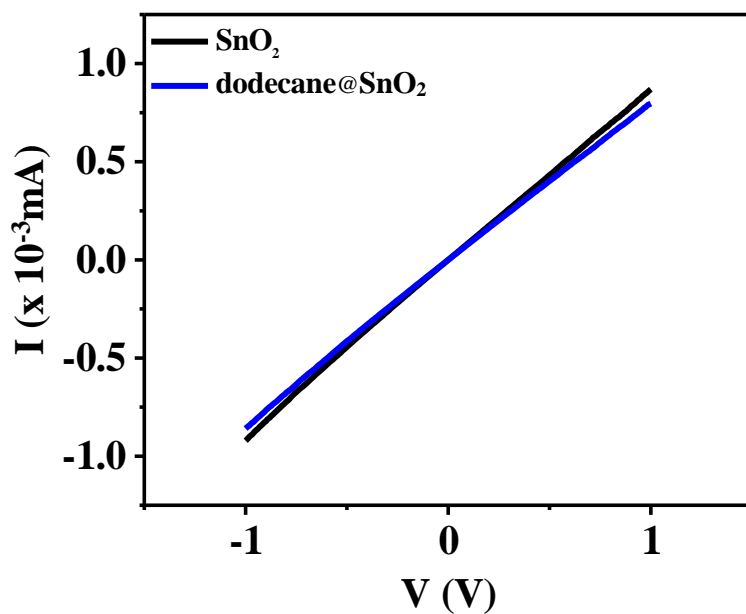

**Figure S4.** I-V curves of the two-terminal device based on SnO<sub>2</sub> and dodecane@SnO<sub>2</sub>, respectively.

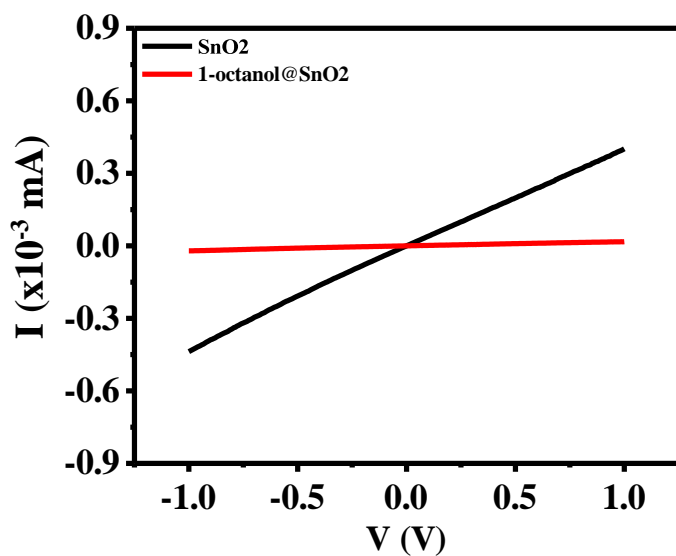

**Figure S5.** I-V curves of the two-terminal device based on SnO<sub>2</sub> and 1-octanol@SnO<sub>2</sub>, respectively.

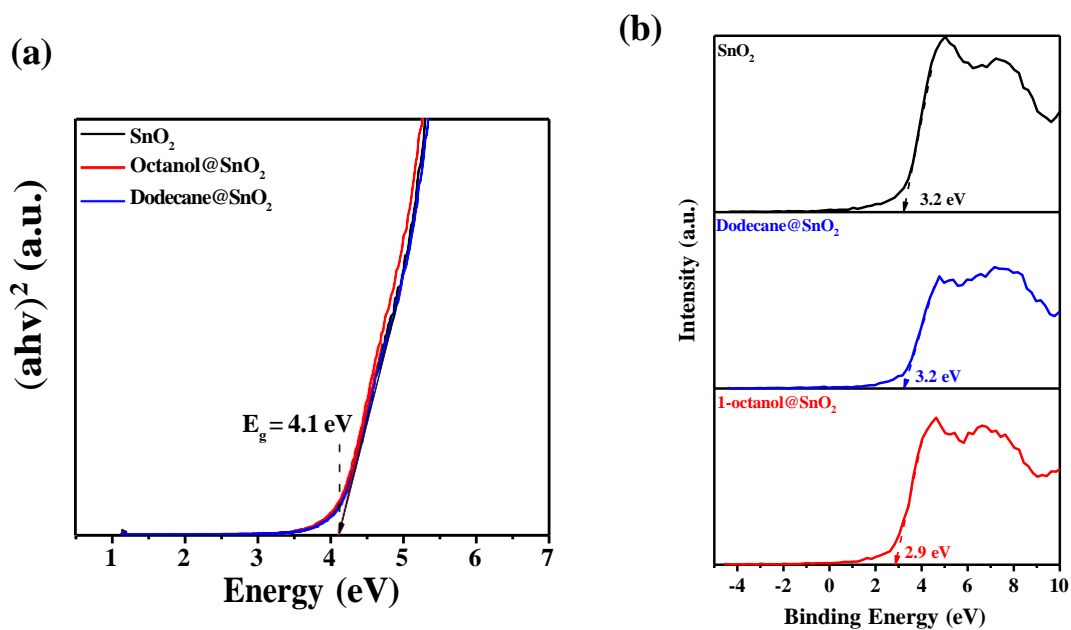

**Figure S6.** (a) Tauc plot analysis of optical bandgap for SnO<sub>2</sub>(black), 1-octanol@SnO<sub>2</sub>(red), and dodecane@SnO<sub>2</sub>(blue), respectively. (b) XPS valence band (VB-XPS) spectra with the Fermi levels to be 3.2 eV for SnO<sub>2</sub>(black), 2.9 eV for 1-octanol@SnO<sub>2</sub>(red), and 3.2 eV for dodecane@SnO<sub>2</sub>(blue).

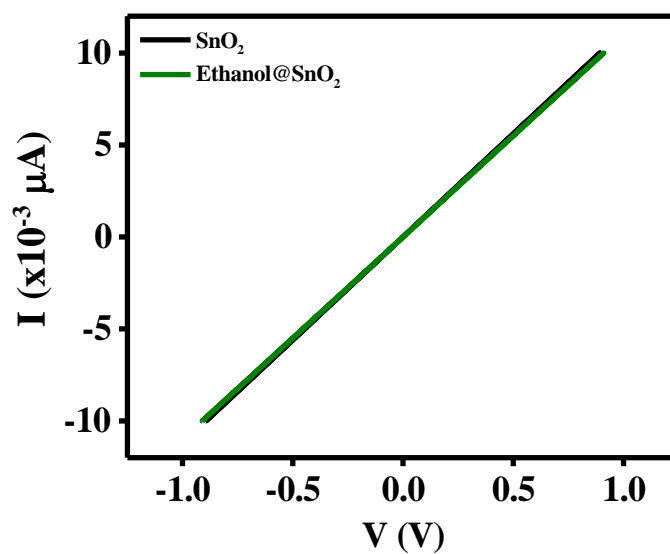

**Figure S7.** I-V curves of the two-terminal device based on  $\text{SnO}_2$  and  $\text{ethanol@SnO}_2$ , respectively.

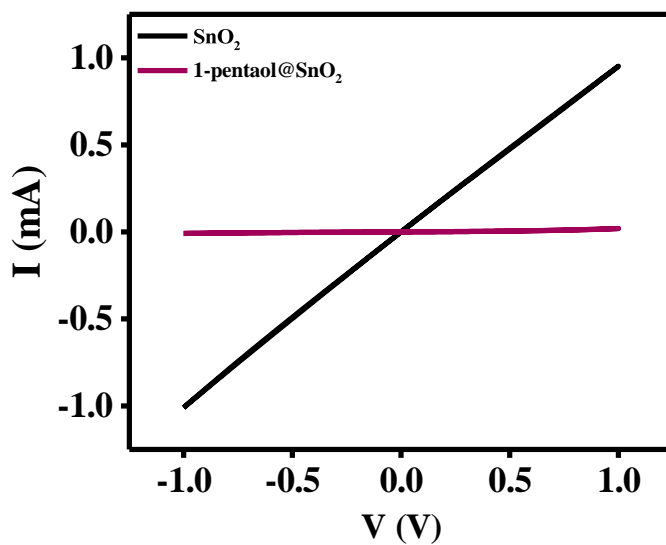

**Figure S8.** I-V curves of the two-terminal device based on  $\text{SnO}_2$  and  $1\text{-pentanol@SnO}_2$ , respectively.

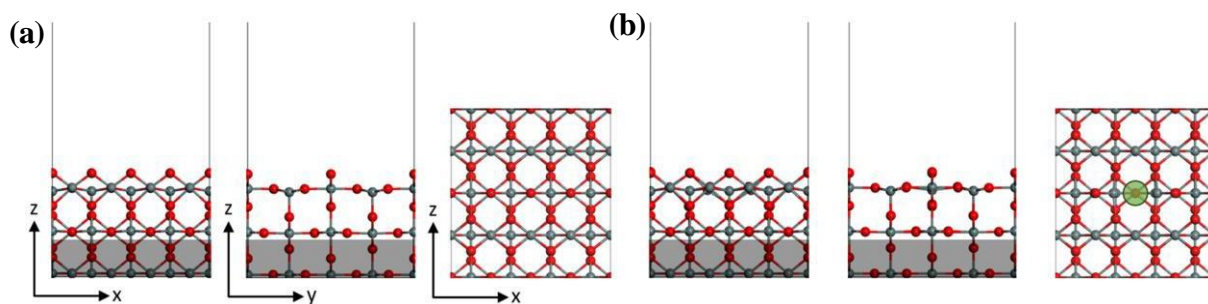

**Figure S9.** Top and side views of the optimised (a) pristine  $\text{SnO}_2(110)$  and (b)  $\text{SnO}_2(110)\text{-VO}$  surfaces.

**Table S1.** Summary of the binding configuration, binding energy and binding distance when the 1-octanol molecule interacting with  $\text{SnO}_2$  and  $\text{SnO}_2\text{-VO}$  surface.

| Surface                       | Configuration | BE (eV) | $d(\text{O}_{\text{ads}}\text{-Sn}_{\text{sub}})$ (Å) | $d(\text{H}_{\text{ads}}\text{-O}_{\text{sub}})$ (Å) | $d(\text{H}_{\text{ads}}\text{-O}_{\text{ads}})$ (Å) |
|-------------------------------|---------------|---------|-------------------------------------------------------|------------------------------------------------------|------------------------------------------------------|
| $\text{SnO}_2(110)$           | p1            | -2.10   | 2.06                                                  | 1.02                                                 | 1.75                                                 |
|                               | p2            | -1.85   | 1.44                                                  | 1.02                                                 | 1.70                                                 |
| $\text{SnO}_2(110)\text{-VO}$ | d1            | -2.24   | 2.06                                                  | 1.01                                                 | 1.77                                                 |
|                               | d2            | -1.21   | 2.47, 2.58                                            | -                                                    | 0.98                                                 |
|                               | d3            | -1.19   | 2.53, 2.46                                            | -                                                    | 0.98                                                 |
|                               | d4            | -1.07   | 2.27                                                  | -                                                    | 0.98                                                 |

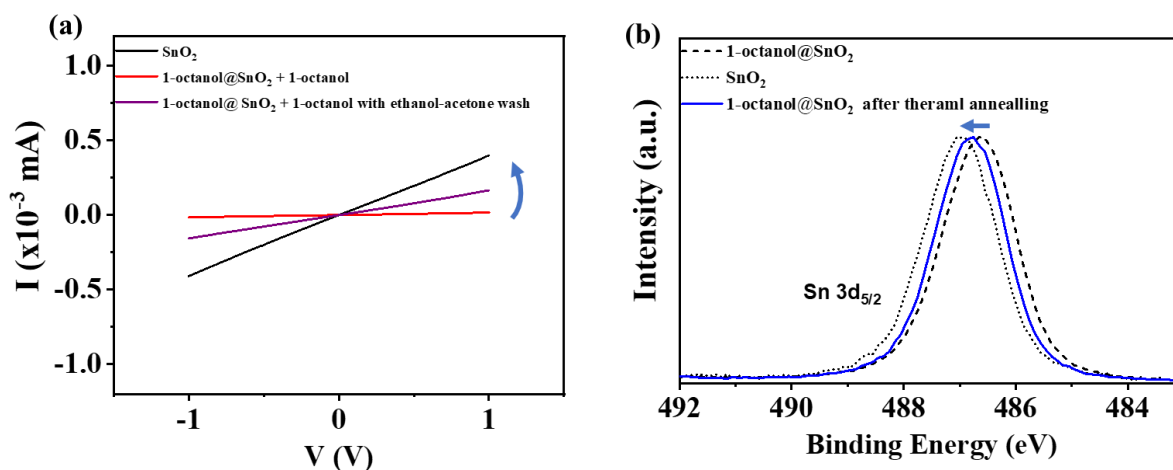

**Figure S10.** (a) I-V curves of the two-terminal device as indicated samples. (b) XPS of Sn 3d as indicated samples.

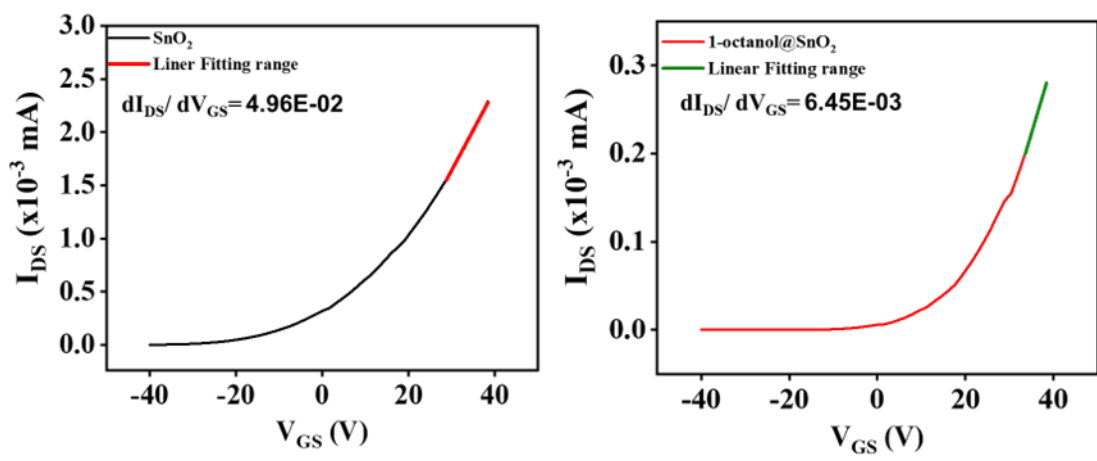

**Figure S11.** Transfer curves of FET devices of SnO<sub>2</sub> and 1-octanol@SnO<sub>2</sub>. The highlighted regions indicate the fitting region for the corresponding slope of  $dI_{DS}/dV_{GS}$  for electron mobility calculations.
